# Supplementary material for: Exogenous Melatonin Improves Seed Germination of Wheat (Triticum aestivum L.) under Salt Stress
Source: MDPI journal article supplement (doi:10.3390/ijms23158436), 2022-07-29
Supplement: s1 [file s1]

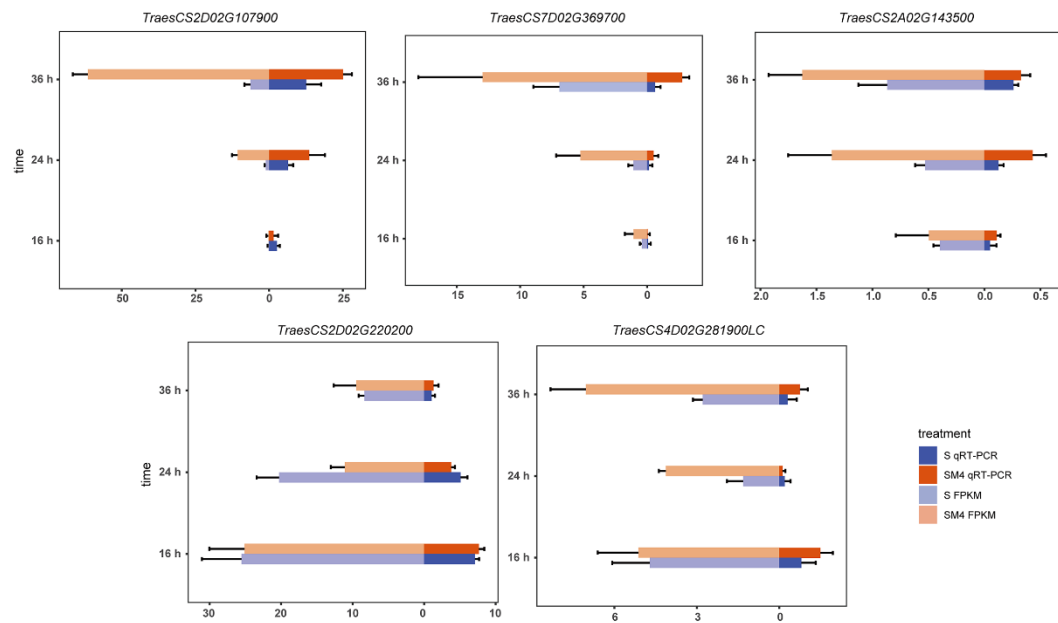

**Figure S1. Effects of melatonin on gene expression under salt stress in wheat seed by qRT-PCR.** Genes: *TraesCS2D02G107900*, *TraesCS7D02G369700*, *TraesCS2A02G143500*, *TraesCS2D02G220200*, and *TraesCS4D02G281900LC*. SM4: germination of seeds treated with 200 μM melatonin under 200 mM NaCl solution; S: germination of seeds treated with 200 mM NaCl.

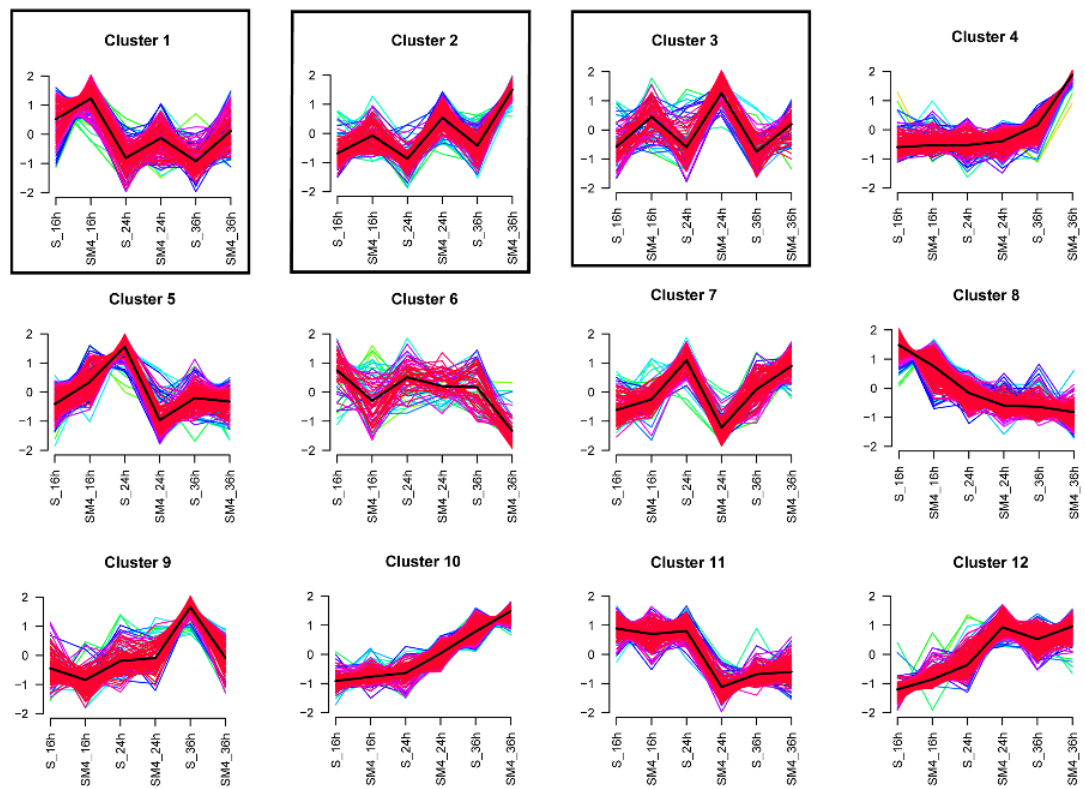

**Figure S2. Clustering of all DEGs based on their expression patterns in S and SM4 at 16 h, 24 h and 36 h.** 12 clusters shown different expression patterns, and cluster 1, cluster 2 and cluster 3 were selected to further analysis. The abscissa represented different treatment in different time and ordinate represented normalized expression value. The black lines represented the mean expression trend of DEGs (other lines) belonging to each cluster.

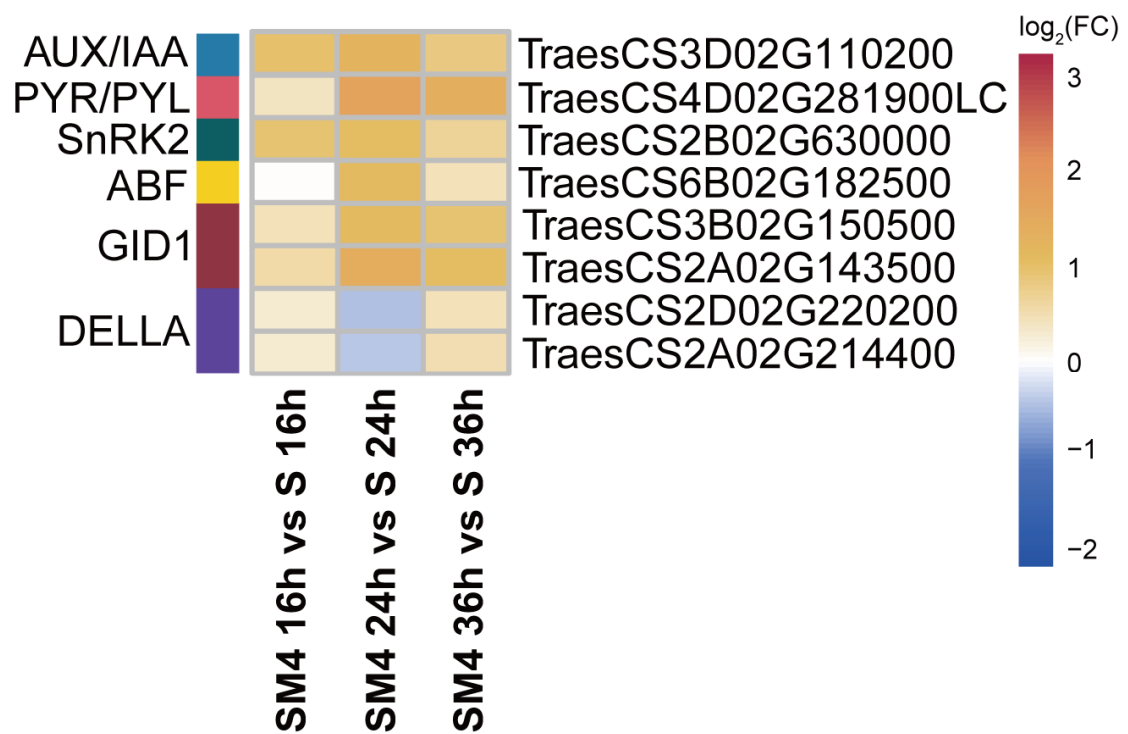

Figure S3. The heatmap of the DEGs in the pathway of plant hormone signal transduction. The color scale of the heat map represents up-regulated (red) and down-regulated (blue).

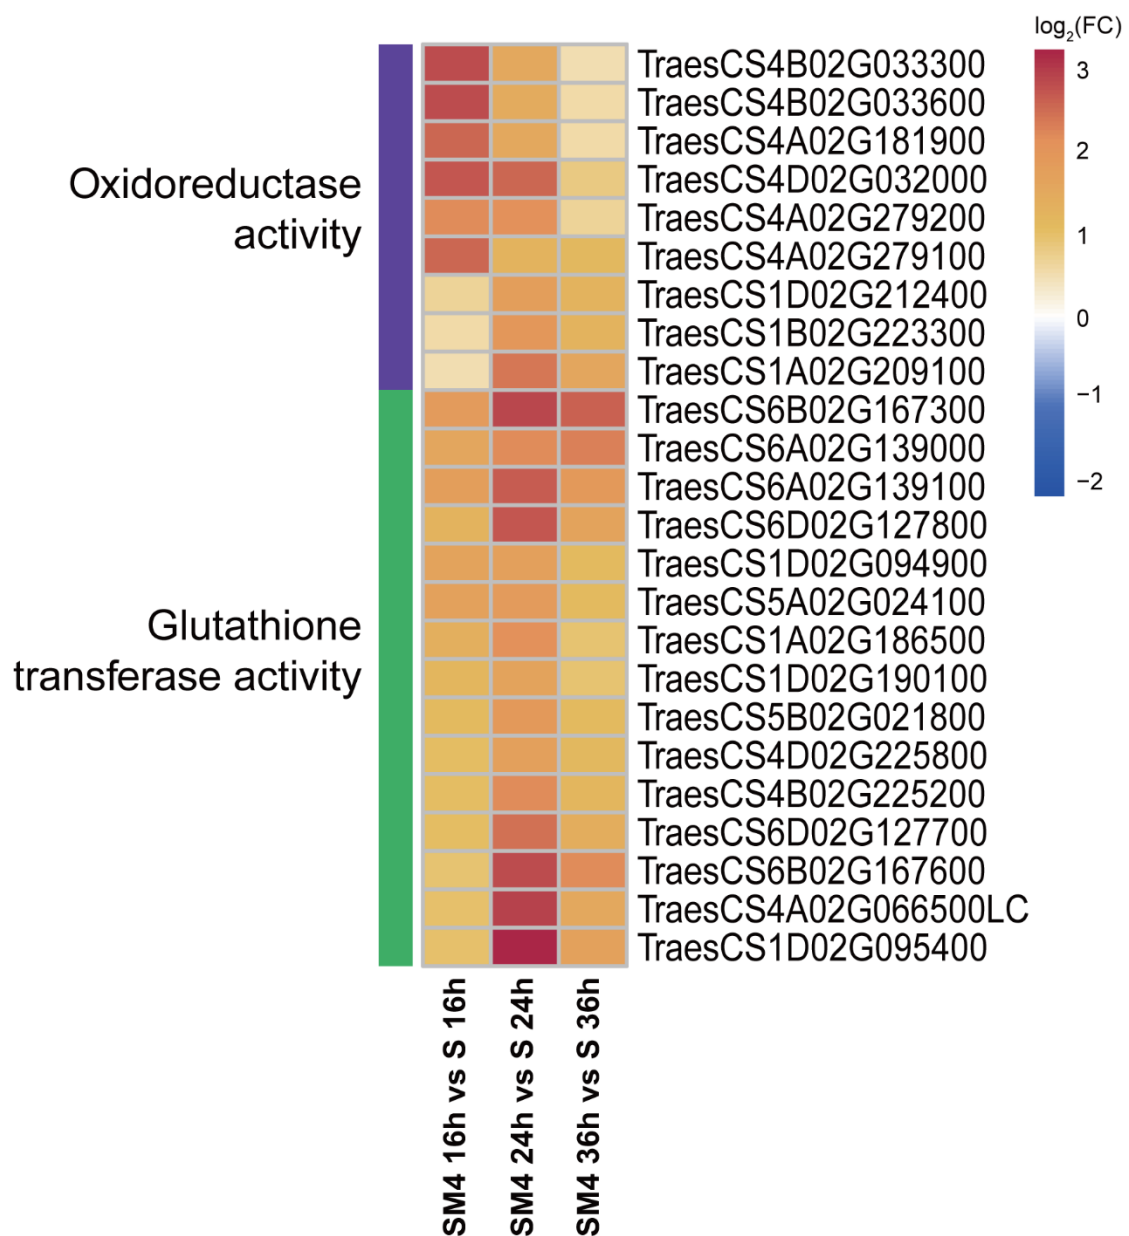

Figure S4. The heatmap of the DEGs in oxidoreductase activity and glutathione transferase activity. The color scale of the heat map represents up-regulated (red) and down-regulated (blue).

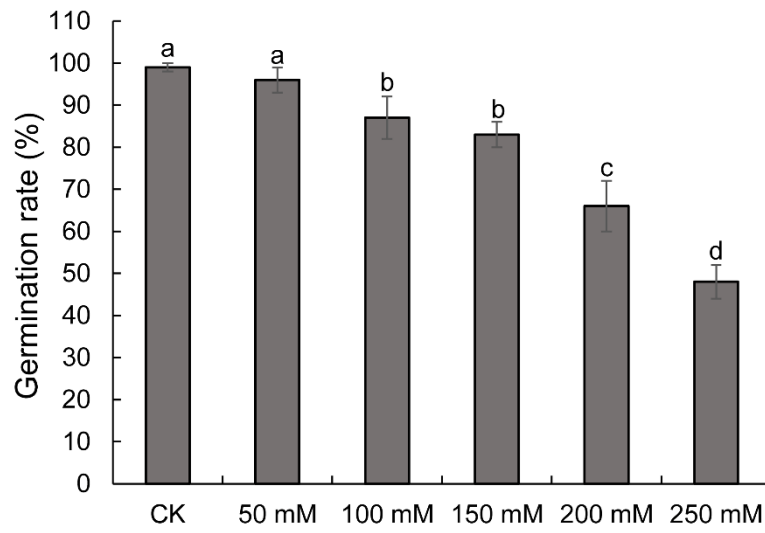

**Figure S5. The germination rate of the wheat seeds in different NaCl concentration.** The error bar in the figure represents the SD (n = 3). Different letters represent significant ( $P < 0.05$ ).

**Table S1.** Quality statistics of filtered transcriptome Reads.

| Sample    | Total Raw Reads (M) | Total Clean Reads (M) | Total Clean Bases (Gb) | Clean Reads Q20 (%) | Clean Reads Q30 (%) | Clean Reads Ratio (%) |
|-----------|---------------------|-----------------------|------------------------|---------------------|---------------------|-----------------------|
| SM4-16h-1 | 82.7                | 69.01                 | 10.35                  | 95.29               | 89.44               | 83.44                 |
| SM4-16h-2 | 86.01               | 69.26                 | 10.39                  | 95.36               | 89.61               | 80.52                 |
| SM4-16h-3 | 82.7                | 69.28                 | 10.39                  | 95.39               | 89.58               | 83.77                 |
| SM4-24h-1 | 79.4                | 67.88                 | 10.18                  | 95.59               | 90.03               | 85.5                  |
| SM4-24h-2 | 82.7                | 68.77                 | 10.32                  | 95.45               | 89.66               | 83.15                 |
| SM4-24h-3 | 82.7                | 69.82                 | 10.47                  | 95.53               | 89.91               | 84.43                 |
| SM4-36h-1 | 82.7                | 68.73                 | 10.31                  | 95.75               | 90.38               | 83.1                  |
| SM4-36h-2 | 79.4                | 67.26                 | 10.09                  | 95.3                | 89.42               | 84.72                 |
| SM4-36h-3 | 73.62               | 67.69                 | 10.15                  | 95.82               | 90.16               | 91.95                 |
| S-16h-1   | 79.4                | 67.21                 | 10.08                  | 95.41               | 89.64               | 84.66                 |
| S-16h-2   | 79.4                | 67.34                 | 10.1                   | 95.58               | 90.02               | 84.81                 |
| S-16h-3   | 82.7                | 68.72                 | 10.31                  | 95.47               | 89.8                | 83.09                 |
| S-24h-1   | 79.4                | 67.67                 | 10.15                  | 95.45               | 89.72               | 85.23                 |
| S-24h-2   | 82.7                | 69.71                 | 10.46                  | 95.37               | 89.53               | 84.29                 |
| S-24h-3   | 82.7                | 69.58                 | 10.44                  | 95.45               | 89.74               | 84.13                 |
| S-36h-1   | 82.7                | 68.96                 | 10.34                  | 95.44               | 89.69               | 83.38                 |
| S-36h-2   | 86.01               | 69.04                 | 10.36                  | 95.43               | 89.78               | 80.27                 |
| S-36h-3   | 82.7                | 68.16                 | 10.22                  | 95.48               | 89.8                | 82.41                 |

**Table S2.** The DEGs number in the clusters of the DEGs expression patterns.

| Cluster    | Number | Cluster    | Number | Cluster    | Number |
|------------|--------|------------|--------|------------|--------|
| Cluster 1  | 154    | Cluster 2  | 147    | Cluster 3  | 87     |
| Cluster 4  | 512    | Cluster 5  | 160    | Cluster 6  | 68     |
| Cluster 7  | 131    | Cluster 8  | 286    | Cluster 9  | 112    |
| Cluster 10 | 528    | Cluster 11 | 153    | Cluster 12 | 300    |

**Table S3.** DEGs in plant hormone signal transduction.

| Gene ID              | Pathway Name                                                                                                                                                | Level 1                                                              | Level 2                                                         |
|----------------------|-------------------------------------------------------------------------------------------------------------------------------------------------------------|----------------------------------------------------------------------|-----------------------------------------------------------------|
| TraesCS2A02G143500   | ko04075//Plant hormone signal transduction                                                                                                                  | Environmental Information Processing                                 | Signal transduction                                             |
| TraesCS2A02G214400   | ko04075//Plant hormone signal transduction                                                                                                                  | Environmental Information Processing                                 | Signal transduction                                             |
| TraesCS2A02G433500   | ko04075//Plant hormone signal transduction                                                                                                                  | Environmental Information Processing                                 | Signal transduction                                             |
| TraesCS2B02G630000   | ko04016//MAPK signaling pathway - plant;ko04075//Plant hormone signal transduction                                                                          | Environmental Information Processing                                 | Signal transduction                                             |
| TraesCS2D02G220200   | ko04075//Plant hormone signal transduction                                                                                                                  | Environmental Information Processing                                 | Signal transduction                                             |
| TraesCS2D02G437500LC | ko04075//Plant hormone signal transduction;ko04016//MAPK signaling pathway - plant                                                                          | Environmental Information Processing                                 | Signal transduction                                             |
| TraesCS3B02G150500   | ko04075//Plant hormone signal transduction                                                                                                                  | Environmental Information Processing                                 | Signal transduction                                             |
| TraesCS3B02G537400   | ko04075//Plant hormone signal transduction                                                                                                                  | Environmental Information Processing                                 | Signal transduction                                             |
| TraesCS3B02G882200LC | ko01212//Fatty acid metabolism;ko01040//Biosynthesis of unsaturated fatty acids;ko00061//Fatty acid biosynthesis;ko04075//Plant hormone signal transduction | Metabolism; Environmental Information Processing                     | Global and overview maps; Signal transduction; Lipid metabolism |
| TraesCS3D02G110200   | ko04075//Plant hormone signal transduction                                                                                                                  | Environmental Information Processing                                 | Signal transduction                                             |
| TraesCS3D02G429400   | ko04075//Plant hormone signal transduction                                                                                                                  | Environmental Information Processing                                 | Signal transduction                                             |
| TraesCS4B02G012100   | ko03015//mRNA surveillance pathway;ko04016//MAPK signaling pathway - plant;ko04075//Plant hormone signal transduction                                       | Environmental Information Processing; Genetic Information Processing | Translation; Signal transduction                                |
| TraesCS4D02G281900LC | ko04016//MAPK signaling pathway - plant;ko04075//Plant hormone signal transduction                                                                          | Environmental Information Processing                                 | Signal transduction                                             |
| TraesCS5A02G183300   | ko04626//Plant-pathogen interaction;ko04016//MAPK signaling pathway - plant;ko04075//Plant hormone                                                          | Environmental Information Processing; Organismal Systems             | Signal transduction; Environmental adaptation                   |



|                      |                                |                           |        |                         |                     |
|----------------------|--------------------------------|---------------------------|--------|-------------------------|---------------------|
|                      | signal transduction            |                           |        |                         |                     |
|                      | ko04016//MAPK                  | signaling                 |        |                         |                     |
|                      | pathway - plant;ko04075//Plant | hormone                   | signal | Environmental           | Environmental       |
| TraesCS5B02G181500   | transduction;ko04626//Plant-   | pathogen interaction      |        | Information Processing; | adaptation; Signal  |
|                      | ko04075//Plant                 | hormone                   | signal | Organismal Systems      | transduction        |
|                      | transduction;ko04626//Plant-   | pathogen                  |        | Environmental           | Signal              |
| TraesCS5D02G259800LC | interaction;ko04016//MAPK      | signaling pathway - plant |        | Information Processing; | transduction;       |
|                      |                                |                           |        | Organismal Systems      | Environmental       |
|                      | ko04075//Plant                 | hormone                   | signal |                         | adaptation          |
| TraesCS6B02G182500   | transduction                   |                           |        | Environmental           | Signal transduction |
|                      |                                |                           |        | Information Processing  |                     |
| TraesCS7A02G328100   | ko04075//Plant                 | hormone                   | signal | Environmental           | Signal transduction |
|                      | transduction                   |                           |        | Information Processing  |                     |
| TraesCS7A02G461700   | ko04075//Plant                 | hormone                   | signal | Environmental           | Signal transduction |
|                      | transduction                   |                           |        | Information Processing  |                     |
| TraesCS7B02G049000   | ko04075//Plant                 | hormone                   | signal | Environmental           | Signal transduction |
|                      | transduction                   |                           |        | Information Processing  |                     |
| TraesCS7B02G228900   | ko04075//Plant                 | hormone                   | signal | Environmental           | Signal transduction |
|                      | transduction                   |                           |        | Information Processing  |                     |
| TraesCS7B02G335000   | ko04075//Plant                 | hormone                   | signal | Environmental           | Signal transduction |
|                      | transduction                   |                           |        | Information Processing  |                     |
| TraesCS7D02G370700   | ko04075//Plant                 | hormone                   | signal | Environmental           | Signal transduction |
|                      | transduction                   |                           |        | Information Processing  |                     |
| TraesCS7D02G426000   | ko04075//Plant                 | hormone                   | signal | Environmental           | Signal transduction |
|                      | transduction                   |                           |        | Information Processing  |                     |

---

**Table S4.** The most enriched GO terms of different modules.

|                        | ID         | Description                                          | p.adjust | Count |
|------------------------|------------|------------------------------------------------------|----------|-------|
| MEblue in 16 h         | GO:0010286 | heat acclimation                                     | 0.000677 | 2     |
|                        | GO:0008219 | cell death                                           | 0.007547 | 2     |
|                        | GO:0009723 | response to ethylene                                 | 0.007547 | 2     |
|                        | GO:0009753 | response to jasmonic acid                            | 0.008019 | 2     |
|                        | GO:0009735 | response to cytokinin                                | 0.00862  | 2     |
| MEgreen in 36 h        | GO:0008878 | glucose-1-phosphate<br>adenylyltransferase activity  | 1.70E-10 | 4     |
|                        | GO:0006112 | energy reserve metabolic process                     | 4.95E-10 | 5     |
|                        | GO:0006097 | glyoxylate cycle                                     | 2.23E-08 | 3     |
|                        | GO:0046487 | glyoxylate metabolic process                         | 2.23E-08 | 3     |
|                        | GO:0019252 | starch biosynthetic process                          | 4.10E-08 | 4     |
|                        | GO:0070566 | adenylyltransferase activity                         | 4.30E-08 | 4     |
|                        | GO:0019566 | arabinose metabolic process                          | 5.52E-08 | 3     |
|                        | GO:0046373 | L-arabinose metabolic process                        | 5.52E-08 | 3     |
|                        | GO:0009514 | glyoxysome                                           | 5.96E-08 | 3     |
|                        | GO:0005982 | starch metabolic process                             | 1.35E-07 | 4     |
|                        | GO:0046556 | alpha-L-arabinofuranosidase<br>activity              | 6.40E-07 | 3     |
|                        | GO:0016833 | oxo-acid-lyase activity                              | 1.64E-06 | 3     |
|                        | GO:0019321 | pentose metabolic process                            | 2.35E-06 | 3     |
|                        | GO:0005777 | peroxisome                                           | 6.86E-06 | 4     |
|                        | GO:0042579 | microbody                                            | 6.86E-06 | 4     |
|                        | GO:0006099 | tricarboxylic acid cycle                             | 4.19E-05 | 3     |
|                        | GO:0006101 | citrate metabolic process                            | 4.36E-05 | 3     |
|                        | GO:0006081 | cellular aldehyde metabolic process                  | 7.28E-05 | 3     |
| MEturquoise in<br>36 h | GO:0009768 | photosynthesis, light harvesting in<br>photosystem I | 2.05E-07 | 5     |
|                        | GO:0010410 | hemicellulose metabolic process                      | 1.31E-06 | 8     |
|                        | GO:0016762 | xyloglucan:xyloglucosyl transferase<br>activity      | 1.31E-06 | 6     |
|                        | GO:0031225 | anchored component of membrane                       | 3.06E-06 | 7     |
|                        | GO:0009834 | plant-type secondary cell wall<br>biogenesis         | 3.51E-06 | 5     |
|                        | GO:0010411 | xyloglucan metabolic process                         | 3.74E-06 | 6     |
|                        | GO:0009765 | photosynthesis, light harvesting                     | 7.85E-06 | 5     |
|                        | GO:0008171 | O-methyltransferase activity                         | 1.90E-05 | 6     |
|                        | GO:0010287 | plastoglobule                                        | 2.05E-05 | 5     |
|                        | GO:0071949 | FAD binding                                          | 7.97E-05 | 6     |
|                        | GO:0009832 | plant-type cell wall biogenesis                      | 0.000165 | 5     |

|            |                                                |          |   |
|------------|------------------------------------------------|----------|---|
| GO:0046658 | anchored component of plasma<br>membrane       | 0.000168 | 5 |
| GO:0046271 | phenylpropanoid catabolic process              | 0.000168 | 4 |
| GO:0046274 | lignin catabolic process                       | 0.000168 | 4 |
| GO:0052716 | hydroquinone:oxygen<br>oxidoreductase activity | 0.000168 | 4 |
| GO:0009698 | phenylpropanoid metabolic process              | 0.000169 | 5 |
| GO:0009522 | photosystem I                                  | 0.000392 | 5 |
| GO:0009808 | lignin metabolic process                       | 0.000392 | 4 |
| GO:0032578 | aleurone grain membrane                        | 0.000498 | 2 |
| GO:0033095 | aleurone grain                                 | 0.000498 | 2 |

---

**Table S5.** The KEGG Orthology of different modules.

|                     | ID     | Description                                                  | p.adjust | Count |
|---------------------|--------|--------------------------------------------------------------|----------|-------|
| MEblue in 16 h      | K20027 | palmitoyltransferase ZDHHC1/11                               | 1.11E-10 | 6     |
|                     | K13519 | lysophospholipid acyltransferase                             | 3.07E-10 | 6     |
|                     | K14510 | serine/threonine-protein kinase CTR1                         | 0.000317 | 2     |
|                     | K04424 | sterile alpha motif and leucine zipper containing kinase AZK | 0.000768 | 2     |
|                     | K13030 | cyanohydrin beta-glucosyltransferase                         | 0.007638 | 2     |
|                     | K22706 | (R)-mandelonitrile beta-glucosyltransferase                  | 0.007638 | 2     |
| MEgreen in 36 h     | K00975 | glucose-1-phosphate adenylyltransferase                      | 3.30E-09 | 4     |
|                     | K01209 | alpha-N-arabinofuranosidase                                  | 5.20E-08 | 3     |
|                     | K13449 | pathogenesis-related protein 1                               | 5.45E-06 | 3     |
|                     | K11275 | histone H1/5                                                 | 0.000627 | 2     |
|                     | K14423 | methylsterol monooxygenase 1                                 | 0.008588 | 1     |
|                     | K16298 | serine carboxypeptidase-like clade IV                        | 0.008588 | 1     |
|                     | K01006 | pyruvate, orthophosphate dikinase                            | 0.008588 | 1     |
| MEturquoise in 36 h | K06125 | 4-hydroxybenzoate polyprenyltransferase                      | 1.02E-12 | 7     |
|                     | K11292 | transcription elongation factor SPT6                         | 7.41E-09 | 6     |
|                     | K22455 | estrogen receptor-binding fragment-associated gene 9 protein | 4.53E-06 | 4     |
|                     | K08235 | xyloglucan:xyloglucosyl transferase                          | 6.18E-06 | 6     |
|                     | K22395 | cinnamyl-alcohol dehydrogenase                               | 5.15E-05 | 5     |
|                     | K09250 | cellular nucleic acid-binding protein                        | 5.64E-05 | 4     |
|                     | K20495 | long-chain fatty acid omega-monooxygenase                    | 0.000205 | 3     |
|                     | K14641 | apyrase                                                      | 0.000335 | 3     |
|                     | K13030 | cyanohydrin beta-glucosyltransferase                         | 0.000383 | 4     |
|                     | K22706 | (R)-mandelonitrile beta-glucosyltransferase                  | 0.000423 | 4     |
|                     | K01183 | chitinase                                                    | 0.000436 | 5     |
|                     | K05681 | ATP-binding cassette, subfamily G (WHITE), member 2          | 0.000578 | 4     |
|                     | K17506 | protein phosphatase 1L                                       | 0.002597 | 3     |
|                     | K01568 | pyruvate decarboxylase                                       | 0.003087 | 4     |
|                     | K01870 | isoleucyl-tRNA synthetase                                    | 0.003659 | 3     |

**Table S6.** Hub genes statistics of different modules.

| Module      | Gene ID            | Degree | Annotation                                                                                     |
|-------------|--------------------|--------|------------------------------------------------------------------------------------------------|
| MEblue      | TraesCS4A02G171500 | 47     | PREDICTED: RGS domain-containing serine/threonine-protein kinase A-like.[Triticum aestivum]    |
|             | TraesCS5D02G343000 | 44     | PREDICTED: serine/threonine-protein kinase STY46-like.[Triticum aestivum]                      |
|             | TraesCS6D02G030300 | 42     | PREDICTED: lysine-specific demethylase JMJ25-like. [Triticum aestivum]                         |
|             | TraesCS7B02G227000 | 42     | PREDICTED: tubby-like F-box protein 12. [Triticum aestivum ]                                   |
|             | TraesCS4B02G228000 | 41     | PREDICTED: protein EARLY-RESPONSIVE TO DEHYDRATION 7, chloroplastic-like. [Triticum aestivum ] |
| MEgreen     | TraesCS5A02G424400 | 14     | PREDICTED: peroxisomal (S)-2-hydroxy-acid oxidase GLO1-like. [Triticum aestivum ]              |
|             | TraesCS5B02G138700 | 13     | PREDICTED: alpha-L-arabinofuranosidase 1-like. [Triticum aestivum ]                            |
|             | TraesCS5D02G152100 | 11     | PREDICTED: alpha-L-arabinofuranosidase 1-like. [Triticum aestivum ]                            |
|             | TraesCS2A02G219100 | 10     | TaSAG7 mRNA for isocitrate lyase. [Triticum aestivum ]                                         |
|             | TraesCS2D02G224200 | 8      | PREDICTED: isocitrate lyase. [Triticum aestivum ]                                              |
| MEturquoise | TraesCS3D02G545300 | 94     | PREDICTED: putrescine hydroxycinnamoyltransferase 3-like. [Triticum aestivum ]                 |
|             | TraesCS7D02G267300 | 91     | PREDICTED: PTI1-like tyrosine-protein kinase 3. [Triticum aestivum ]                           |
|             | TraesCS4B02G363700 | 88     | PREDICTED: probable apyrase 3. [Triticum aestivum ]                                            |
|             | TraesCS2A02G152700 | 81     | PREDICTED: transcription factor MYB46-like. [Triticum aestivum ]                               |
|             | TraesCSU02G124500  | 66     | PREDICTED: 7-deoxyloganetin glucosyltransferase-like. [Triticum aestivum ]                     |
|             | TraesCS1B02G199500 | 66     | PREDICTED: uncharacterized protein. [Triticum aestivum ]                                       |
|             | TraesCS4B02G383000 | 61     | PREDICTED: xyloglucan endotransglucosylase/hydrolase protein 31-like. [Triticum aestivum]      |
|             | TraesCS5A02G548500 | 59     | PREDICTED: xyloglucan endotransglucosylase/hydrolase protein 31-like. [Triticum aestivum]      |

**Table S7.** Primers designed by qRT-PCR.

| gene name                               | Primer sequences (5'-3')  |
|-----------------------------------------|---------------------------|
| TraesCS2D02G107900                      | F: ATCGGATCTACGGCGGTGAC   |
|                                         | R: CGAAGTTGCGGACGGTGTT    |
| TraesCS7D02G369700                      | F: TCATGGCTGCCGCTGTCT     |
|                                         | R: CGGTGAAGTTGGCGGTGT     |
| TraesCS2A02G143500                      | F: CGACGAAGAACCAAGAAACAGG |
|                                         | R: TCGCCGAAGGAGAAGAGGAA   |
| TraesCS2D02G220200                      | F: ATGGCACCTGATGCTGAT     |
|                                         | R: ACTCCCTTTGTCGTTTCT     |
| TraesCS4D02G281900LC                    | F: CCTTCTCGGCGGTCTTGG     |
|                                         | R: GCACCGGCTCAAGAACTACCT  |
| Actin1 (As the internal reference gene) | F: CACCGCCGAACGGGAAAT     |
|                                         | R: AAGGACCTCAGGGCAACG     |
| Actin2 (As the internal reference gene) | F: CCAGTACTGCTGACTGAGGC   |
|                                         | R: TGTTGTGCGTCCACTAGCAT   |
